# Supplementary material for: T-bet, but not Gata3, overexpression is detrimental in a neurotropic viral infection
Source: PubMed Central journal article supplement (PMC5585213; doi:10.1038/s41598-017-10980-0), 2017-09-05
Supplement: 41598_2017_10980_MOESM1_ESM.pdf [file 41598_2017_10980_MOESM1_ESM.pdf]

## Supplementary information

### **T-bet, but not Gata3, overexpression is detrimental in a neurotropic viral infection**

Fumitaka Sato, Ph.D.,<sup>a-d,#</sup> Eiichiro Kawai, M.D., Ph.D.,<sup>b,c,#</sup> Nicholas E. Martinez, Ph.D., M.B.A.<sup>b,c</sup>  
Seiichi Omura, Ph.D.,<sup>a-d</sup> Ah-Mee Park, Ph.D.,<sup>a</sup> Satoru Takahashi, M.D., Ph.D.,<sup>e-h</sup>  
Keigyou Yoh, M.D., Ph.D.,<sup>e</sup> and Ikuo Tsunoda, M.D., Ph.D.<sup>a-d,\*</sup>

<sup>a</sup> Department of Microbiology  
Kindai University Faculty of Medicine  
377-2 Ohnohigashi, Osakasayama, Osaka 589-8511, Japan

<sup>b</sup> Department of Microbiology and Immunology  
<sup>c</sup> Center for Molecular and Tumor Virology (CMTV)  
<sup>d</sup> Center for Cardiovascular Diseases and Sciences (CCDS)  
Louisiana State University Health Sciences Center-Shreveport (LSUHSC-S)  
1501 Kings Highway, Shreveport, LA 71130, U.S.A.

<sup>e</sup> Department of Anatomy and Embryology, Faculty of Medicine  
<sup>f</sup> International Institute for Investigative Sleep Medicine (WPI-IIIS)  
<sup>g</sup> Life Science Center, Tsukuba Research Alliance (TARA)  
<sup>h</sup> Laboratory Animal Resource Center (LARC)  
University of Tsukuba  
1-1-1 Tennodai, Tsukuba, Ibaraki 305-8575, Japan

# Drs. Sato and Kawai contributed equally.

\* Corresponding author: Ikuo Tsunoda, M.D., Ph.D.  
Department of Microbiology  
Kindai University Faculty of Medicine  
377-2 Ohnohigashi, Osakasayama, Osaka 589-8511, Japan  
Tel: +81-72-366-0221  
E-mail: itsunoda@med.kindai.ac.jp

## Supplementary Figure 1

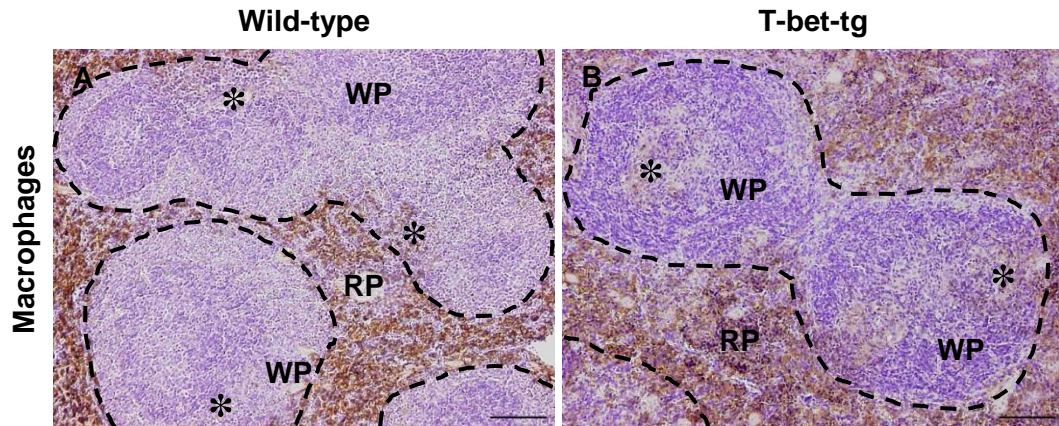

**Supplementary Figure 1.** Splenic red pulp (RP) immunostained for a macrophage-specific marker, F4/80. (**A**, **B**) No significant differences were seen in F4/80 staining between DA virus-infected wild-type (**A**) and T-bet-transgenic (tg) mice (**B**). The dotted lines show the white pulp (WP) and asterisks (\*) are central arteries. RP, red pulp; WP, white pulp. Scale bar = 100  $\mu$ m.

## Supplementary Figure 2

Naïve T-bet-tg

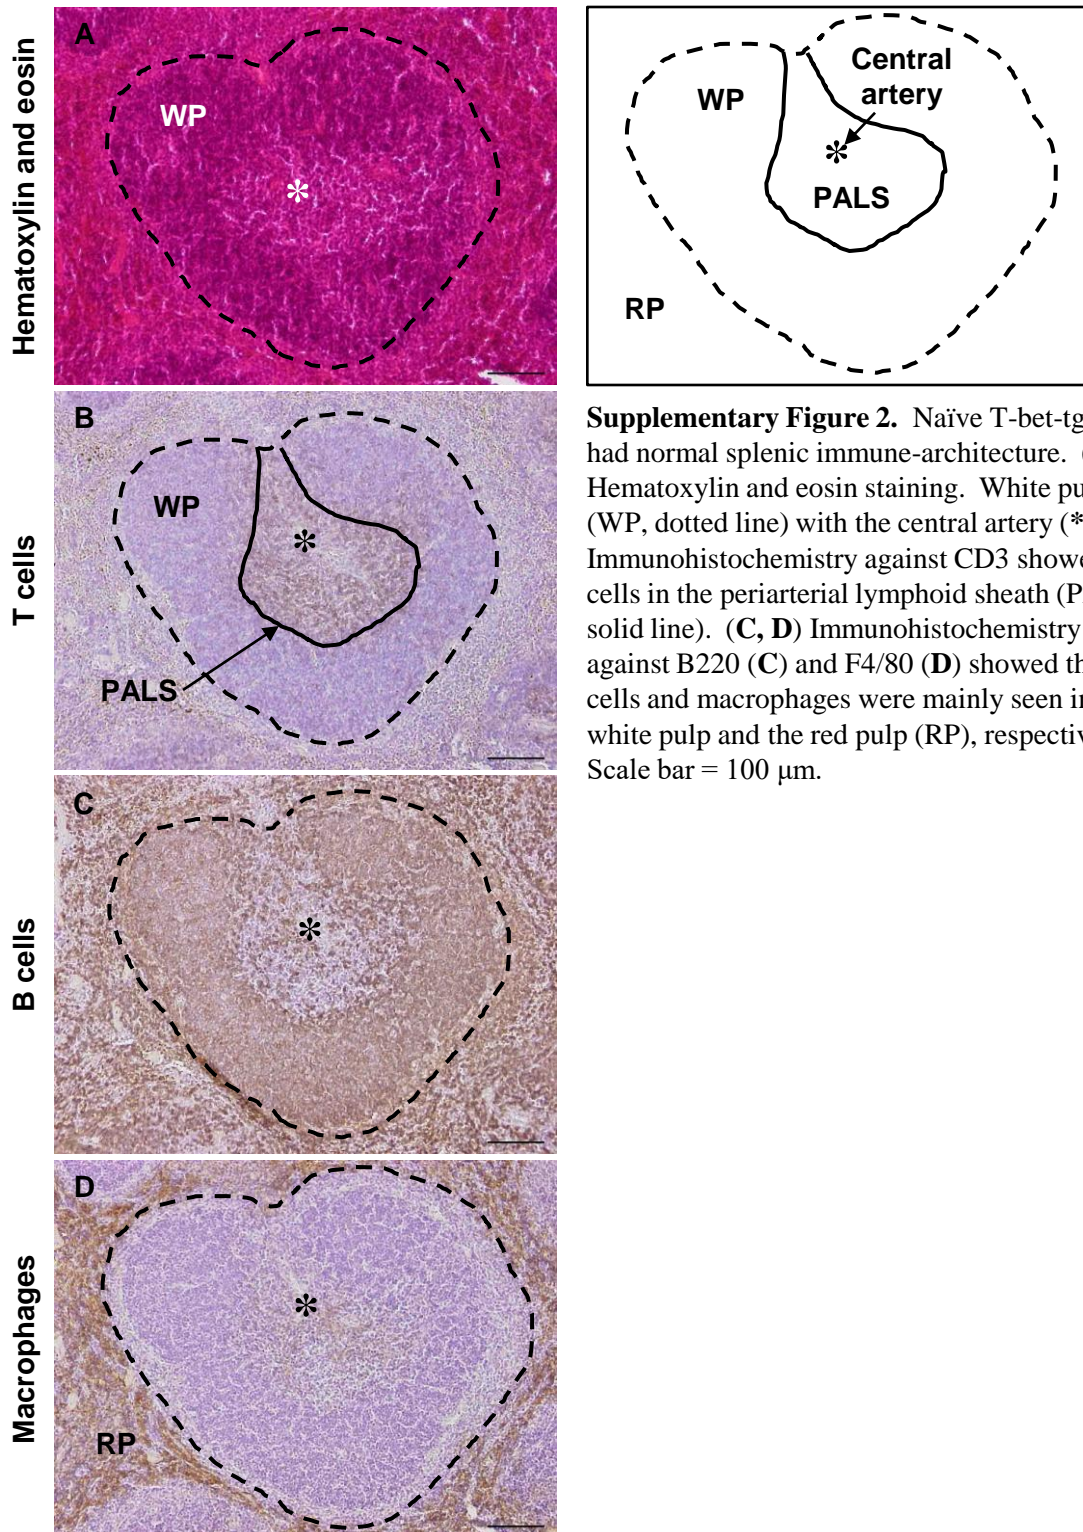

**Supplementary Figure 2.** Naïve T-bet-tg mice had normal splenic immune-architecture. **(A)** Hematoxylin and eosin staining. White pulp (WP, dotted line) with the central artery (\*). **(B)** Immunohistochemistry against CD3 showed T cells in the periaarterial lymphoid sheath (PALS, solid line). **(C, D)** Immunohistochemistry against B220 **(C)** and F4/80 **(D)** showed that B cells and macrophages were mainly seen in the white pulp and the red pulp (RP), respectively. Scale bar = 100  $\mu$ m.

### Supplementary Figure 3

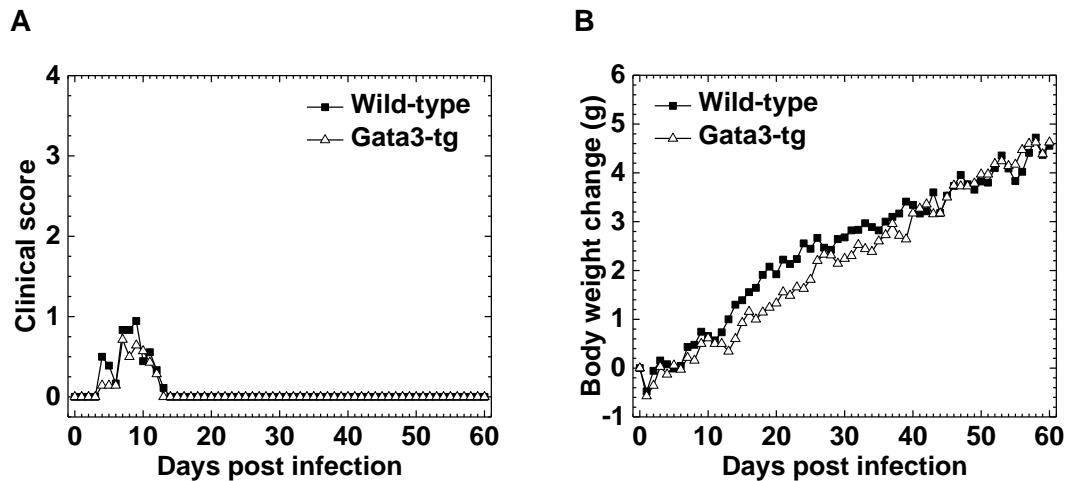

**Supplementary Figure 3.** Gata3 overexpression does not confer susceptibility to Theiler's murine encephalomyelitis virus (TMEV) infection. **(A)** Clinical scores of wild-type mice (closed boxes) and Gata3-tg mice (open triangles) 2 months after infection with the Daniels (DA) strain of TMEV (DA virus). Clinical scores were evaluated by measuring impaired righting reflexes: the proximal end of the mouse's tail was grasped and twisted to the right and then to the left (0, a healthy mouse resists being turn over; 1, the mouse is flipped onto its back but immediately rights itself on one side; 1.5, the mouse is flipped onto its back but immediately rights itself on one sides; 2, the mouse rights itself in 1 to 5 seconds; 3, righting takes more than 5 seconds; and 4, the mouse cannot right itself). **(B)** Body weight changes of DA virus-infected wild-type mice and Gata3-tg mice during the 2-months observation period. **(A, B)** Values are the mean of nine wild-type mice and seven Gata3-tg mice and representative of two independent experiments.

## Supplementary Figure 4

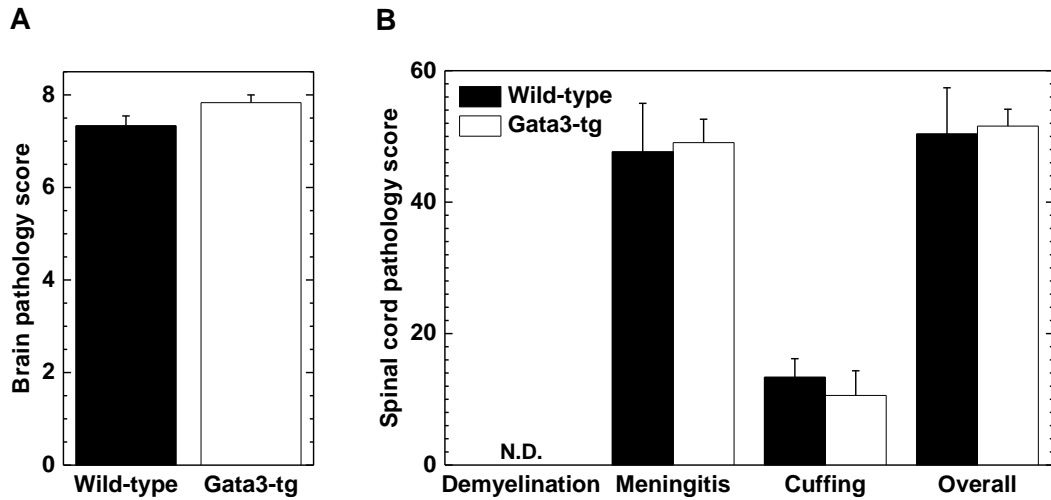

**Supplementary Figure 4.** Gata3 overexpression does not alter neuropathology scores during the acute phase of TMEV infection. (**A**, **B**) Brain and spinal cord pathology scores of wild-type mice (black bar) and Gata3-tg mice (white bar) 1 week after DA virus infection. N.D., not detectable. Values are the mean + standard error of the mean (SEM) of six mice per group. The experiments were conducted twice independently.

## Supplementary Figure 5

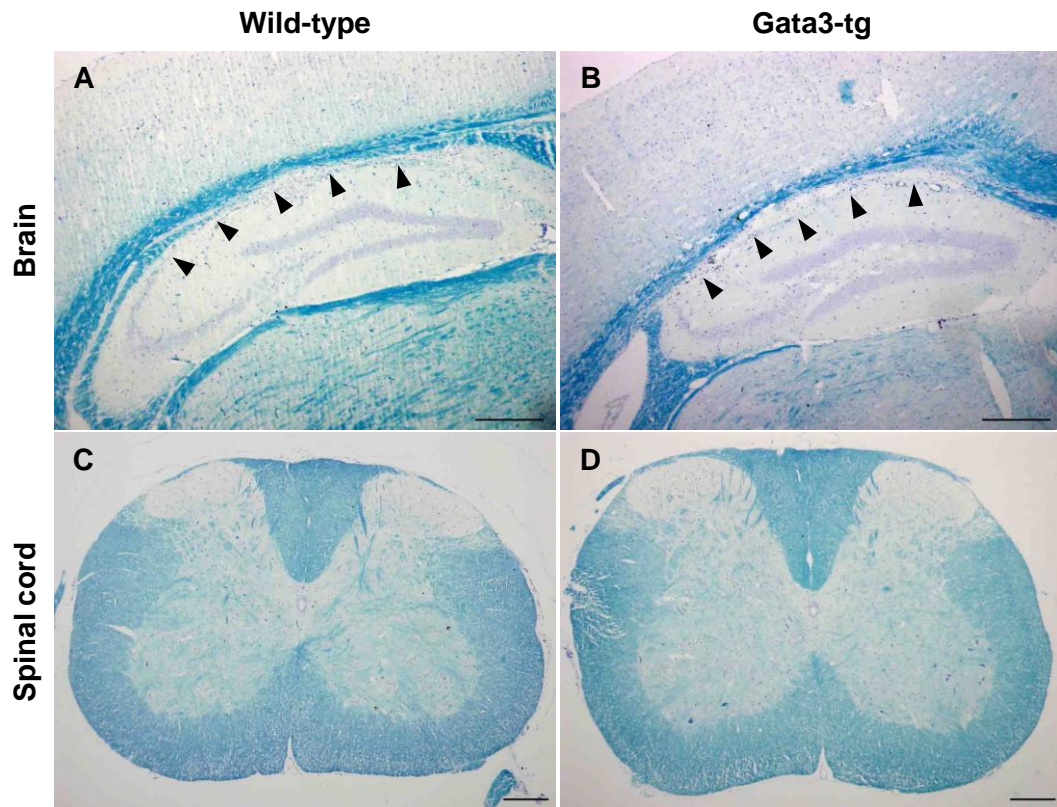

**Supplementary Figure 5.** Gata3 overexpression does not affect neuropathology during the chronic phase of TMEV infection. (A-D) Luxol fast blue stains of the brain and spinal cord sections from wild-type mice and Gata3-tg mice 2 months after DA virus infection. Arrowheads show hippocampal atrophy of the region CA1. Tissue sections are representative of nine wild-type mice and seven Gata3-tg mice and representative of two independent experiments. Scale bar = 300  $\mu\text{m}$  (brain sections) and 200  $\mu\text{m}$  (spinal cord sections).
